# Supplementary material for: The Role of High Fat Diets and Liver Peptidase Activity in the Development of Obesity and Insulin Resistance in Wistar Rats
Source: PubMed Central journal article supplement (PMC7146256; doi:10.3390/nu12030636), 2020-02-28
Supplement: nutrients-12-00636-s001.pdf [file nutrients-12-00636-s001.pdf]

Table 1: Composition of diets (supplementary material)

| Components        | S      |         |           | VOO    |         |           | Bch    |         |           |
|-------------------|--------|---------|-----------|--------|---------|-----------|--------|---------|-----------|
|                   | g/100g | kJ/100g | % Total E | g/100g | kJ/100g | % Total E | g/100g | kJ/100g | % Total E |
| NFE               | 60     | 1003.2  | 72.1      | 48     | 802.6   | 43.4      | 48     | 802.6   | 43.9      |
| Fiber             | 4      |         |           | 3      |         |           | 3      |         |           |
| Protein           | 16.5   | 275.9   | 19.8      | 13     | 217.4   | 11.8      | 14     | 234.1   | 12.8      |
| Minerals<br>(Ash) | 5      |         |           | 5      |         |           | 5      |         |           |
| Lipids            | 3      | 112.9   | 8.1       | 22     | 827.6   | 44.8      | 21     | 790     | 43.3      |
| SFA               | 0.75   | 28.22   | 2.0       | 3.74   | 140.7   | 7.6       | 13.02  | 489.8   | 26.8      |
| MUFA              | 0.50   | 18.81   | 1.4       | 17.38  | 653.8   | 35.4      | 7.56   | 284.4   | 15.5      |
| PUFA              | 1.75   | 65.84   | 4.7       | 0.88   | 33.1    | 1.8       | 0.42   | 15.8    | 0.9       |
| Cholesterol       |        |         |           |        |         |           | 1.50   |         |           |
| Total E           |        | 1392    |           |        | 1848    |           |        | 1827    |           |

Table 2: Substrates for Aminopeptidases incubation media (supplementary material)

| INCUBATION SOLUTION (100 ml) |                                             |             |             |                           |                           |                           |                      |                     |
|------------------------------|---------------------------------------------|-------------|-------------|---------------------------|---------------------------|---------------------------|----------------------|---------------------|
| Enzyme                       | Substrates<br>( $\mu\text{M}$ )             | BSA<br>(mM) | DTT<br>(mM) | EDTA<br>( $\mu\text{M}$ ) | MnCl <sub>2</sub><br>(mM) | CaCl <sub>2</sub><br>(mM) | Buffer               |                     |
|                              |                                             |             |             |                           |                           |                           | Phosphate<br>(50 mM) | Tris-HCl<br>(50 mM) |
| AlaAP                        | Ala- $\beta$ -NA<br>100                     | 1.5         | 0.65        |                           |                           |                           | pH 7.4               |                     |
| ArgAP                        | Arg- $\beta$ -NA<br>100                     | 1.5         | 0.65        |                           |                           |                           | pH 7.4               |                     |
| AspAP                        | Asp- $\beta$ -NA<br>100                     | 1.5         |             |                           |                           | $3 \cdot 10^{-8}$         |                      | pH 7.4              |
| DPP4                         | H-Gly-Pro-4-<br>Methoxy- $\beta$ -NA<br>100 | 1.5         | 0.65        |                           |                           |                           | pH 8.3               |                     |
| GluAP                        | $\alpha$ -Glu- $\beta$ -NA<br>100           | 1.5         | 0.65        |                           | 50                        |                           |                      | pH 7.4              |
| GGT                          | $\gamma$ -Glu- $\beta$ -NA<br>100           | 1.5         | 0.65        |                           |                           |                           | pH 7.4               |                     |
| IRAP                         | Cys- $\beta$ -NA<br>100                     | 1.5         | 0.65        |                           |                           |                           |                      | pH 6.0              |
| LeuAP                        | Leu- $\beta$ -NA<br>100                     | 1.5         | 0.65        |                           |                           |                           | pH 7.4               |                     |
| pGluAP                       | pGlu- $\beta$ -NA<br>100                    | 1.5         | 0.65        | 10.1                      |                           |                           | pH 7.4               |                     |
| TyrAP                        | Tyr- $\beta$ -NA<br>100                     | 1.5         | 0.65        |                           |                           |                           | pH 7.4               |                     |

Table 3: Antibodies used for Western-Blotting (supplementary material)

| <b>Peptide/protein target</b> | <b>Antigen sequence (if known)</b> | <b>Name of Antibody</b>                                           | <b>Manufacturer, catalog #, and/or name of individual providing the antibody</b> | <b>Species raised in; monoclonal or polyclonal</b> | <b>Dilution used</b> |
|-------------------------------|------------------------------------|-------------------------------------------------------------------|----------------------------------------------------------------------------------|----------------------------------------------------|----------------------|
| iNOS                          |                                    | polyclonal Rabbit Anti-iNOS/NOS Type II                           | BD Transduction Laboratories, 610333                                             | rabbit; polyclonal                                 | 1:500                |
| $\alpha$ -tubulin             |                                    | anti- alpha tubulin                                               | Invitrogen Cat# 32-2500                                                          | mouse, monoclonal                                  | 1:5,000              |
| anti-rabbit                   |                                    | peroxidase-conjugated rabbit antibody                             | Vector Labs                                                                      | goat; polyclonal                                   | 1:2,000              |
| mouse IgG                     |                                    | horseradish peroxidase (HRP)-conjugated goat anti-mouse IgG (H+L) | Jackson ImmunoResearch Laboratories, PA, USA. Catalog # 115-035-003              | goat; polyclonal                                   | 1:1,000              |
